# Supplementary material
Source: PubMed Central journal article supplement (PMC10622470)
Supplement: tpmd230361.SD1.pdf [file tpmd230361.SD1.pdf]

## **Supplementary Online Content**

### **Cohort definition and inclusion/exclusion criteria**

**Table S1. International Classification of Diseases, Tenth Revision, Clinical Modification (ICD-10-CM) diagnosis codes for underlying comorbidities.**

**Table S2. Logical Observation Identifiers Names and Codes (LOINC) for laboratory values**

**Table S3. Rx Norm codes for medications.**

**Table S4. Current Procedural Terminology (CPT) relevant codes**

**Patient identification:**

**Positive *Trypanosoma cruzi* IgG criteria:**

Two positive *Trypanosoma cruzi* IgG Ab [Units/volume] in Serum (most recent occurrence) by Immunoassay (laboratory Result: Positive or  $\geq 1.20$  optical density (OD) unit)

**Indeterminate Chronic Chagas Disease**

Patients with a two positive serology for *Trypanosoma cruzi* IgG, who don't have any history or evidence of cardiac injury or cardiomyopathy:

Inclusion criteria:

- Positive *Trypanosoma cruzi* IgG Ab [Units/volume] in Serum (most recent occurrence) by Immunoassay (laboratory Result: Positive or  $\geq 1.20$  optical density (OD) unit) x 2

Exclusion criteria:

- R93.1 Abnormal findings on diagnostic imaging of heart and coronary circulation
- I25 Chronic Ischemic Heart Disease
- I40 Acute Myocarditis
- I41 Myocarditis in diseases classified elsewhere
- I42 Cardiomyopathy
- I43 Cardiomyopathy in diseases classified elsewhere
- I44 Atrioventricular and left bundle-branch block
- I45 Other conduction disorders
- I46 Cardiac arrest
- I47 Paroxysmal tachycardia
- I48 Atrial fibrillation and flutter
- I49 Other cardiac arrhythmias
- I50 Heart failure

- I51 Complications and ill-defined descriptions of heart disease
- I52 Other heart disorders in diseases classified elsewhere
- B57.2 Chagas' disease (chronic) with heart involvement
- Z86.74 Personal history of sudden cardiac arrest
- R94.31 Abnormal electrocardiogram [ECG] [EKG]
- I5A Non-ischemic myocardial injury (non-traumatic)

To explore follow-up outcomes with this indeterminate cohort, we defined the cohort as patients with two positive serologies for *Trypanosoma cruzi* IgG who don't have any history or evidence of cardiac injury or cardiomyopathy before or up to 6 months since the instance of positive serology

**Chronic Chagas Cardiomyopathy definition:**

Patients with two positive serologies for *Trypanosoma cruzi* IgG, who have any history or evidence of cardiac injury or cardiomyopathy:

- Inclusion criteria: Positive *Trypanosoma cruzi* IgG Ab [Units/volume] in Serum (most recent occurrence) by Immunoassay (laboratory Result: Positive or  $\geq 1.20$  optical density (OD) unit) x2

AND

- R93.1 Abnormal findings on diagnostic imaging of heart and coronary circulation
- I25 Chronic Ischemic Heart Disease
- I40 Acute Myocarditis
- I41 Myocarditis in diseases classified elsewhere
- I42 Cardiomyopathy
- I43 Cardiomyopathy in diseases classified elsewhere
- I44 Atrioventricular and left bundle-branch block
- I45 Other conduction disorders
- I46 Cardiac arrest

- I47 Paroxysmal tachycardia
- I48 Atrial fibrillation and flutter
- I49 Other cardiac arrhythmias
- I50 Heart failure
- I51 Complications and ill-defined descriptions of heart disease
- I52 Other heart disorders in diseases classified elsewhere
- B57.2 Chagas' disease (chronic) with heart involvement
- Z86.74 Personal history of sudden cardiac arrest
- R94.31 Abnormal electrocardiogram [ECG] [EKG]
- I5A Non-ischemic myocardial injury (non-traumatic)

To explore follow up outcomes with this Chronic Chagas Cardiomyopathy cohort, we defined the cohort as patients with two positive serologies for *Trypanosoma cruzi* IgG, who don't have any history or evidence of the outcome of interest before or up to 6 months since the instance of positive serology

**Supplementary Table S1.** International Classification of Diseases, Tenth Revision, Clinical Modification (ICD-10-CM) diagnosis codes for underlying comorbidities

| Code    | Description                                                        |
|---------|--------------------------------------------------------------------|
| I10     | Essential (primary) hypertension                                   |
| N18     | Chronic kidney disease (CKD)                                       |
| E11     | Type 2 diabetes mellitus                                           |
| I30-I5A | Other forms of heart disease                                       |
| D60-D64 | Aplastic and other anemias and other bone marrow failure syndromes |
| D61     | Aplastic Anemia                                                    |
| E78.5   | Hyperlipidemia, unspecified                                        |

|         |                                                             |
|---------|-------------------------------------------------------------|
| E66     | Overweight and obesity                                      |
| C00-D49 | Neoplasms                                                   |
| K21     | Gastro-esophageal reflux disease                            |
| I50     | Heart failure                                               |
| B57     | Chagas' disease                                             |
| B57.1   | Acute Chagas' disease without heart involvement             |
| G47     | Sleep disorders                                             |
| J40-J47 | Chronic lower respiratory diseases                          |
| B57.3   | Chagas' disease (chronic) with digestive system involvement |
| A50-A64 | Infections with a predominantly sexual mode of transmission |
| B20-B20 | Human immunodeficiency virus [HIV] disease (B20)            |
| B78     | Strongyloidiasis                                            |
| K30     | Functional dyspepsia                                        |
| K74     | Fibrosis and cirrhosis of liver                             |
| I63     | Cerebral infarction                                         |
| I26     | Pulmonary embolism                                          |
| I25.3   | Left ventricular aneurysm                                   |
| Z86.74  | Personal history of sudden cardiac arrest                   |
| B58     | Toxoplasmosis                                               |
| B57.0   | Acute Chagas' disease with heart involvement                |

|     |                         |
|-----|-------------------------|
| B18 | Chronic viral hepatitis |
|-----|-------------------------|

**Supplementary Table S2.** Logical Observation Identifiers Names and Codes (LOINC) for laboratory values

| Code | Description                                                                    |
|------|--------------------------------------------------------------------------------|
| 9013 | Hematocrit [Volume Fraction] of Blood                                          |
| 9024 | Creatinine [Mass/volume] in Serum, Plasma or Blood                             |
| 9020 | Platelets [# /volume] in Blood                                                 |
| 9044 | Alanine aminotransferase [Enzymatic activity/volume] in Serum, Plasma or Blood |
| 9047 | Aspartate aminotransferase [Enzymatic activity/volume] in Serum or Plasma      |
| 9029 | Sodium [Moles/volume] in Serum, Plasma or Blood                                |
| 9046 | Alkaline phosphatase [Enzymatic activity/volume] in Serum, Plasma or Blood     |
| 9083 | BMI                                                                            |
| 9015 | Leukocytes [# /volume] in Blood                                                |
| 9007 | Eosinophils/100 leukocytes in Blood                                            |
| 9016 | Lymphocytes/100 leukocytes in Blood                                            |
| 9073 | Respiratory rate                                                               |
| 9074 | Heart rate                                                                     |
| 9014 | Hemoglobin [Mass/volume] in Blood                                              |
| 9037 | Hemoglobin A1c/                                                                |

|        |                                                                                      |
|--------|--------------------------------------------------------------------------------------|
| 9000   | Cholesterol [Mass/volume] in Serum or Plasma                                         |
| 9042   | Ferritin [Mass/volume] in Serum, Plasma or Blood                                     |
| 9052   | Lactate dehydrogenase [Enzymatic activity/volume] in Serum or Plasma                 |
| 9003   | Natriuretic peptide B [Mass/volume] in Serum, Plasma or Blood                        |
| 2157-6 | Creatine kinase [Enzymatic activity/volume] in Serum or Plasma                       |
| 9063   | C reactive protein [Mass/volume] in Serum, Plasma or Blood                           |
| 9005   | Troponin I. Cardiac [Mass/volume] in Serum, Plasma or Blood                          |
| 9072   | Natriuretic peptide. B prohormone N-Terminal [Mass/volume] in Serum, Plasma or Blood |
| 2001   | Corrected QT Interval (QTc)                                                          |
| 2003   | Left Ventricular Ejection Fraction (LVEF) (%)                                        |

**Supplementary Table S3.** Rx Norm codes for medications

| Code  | Description           |
|-------|-----------------------|
| CV100 | BETA BLOCKERS/RELATED |
| CV702 | LOOP DIURETICS        |
| 83367 | atorvastatin          |
| CV800 | ACE INHIBITORS        |

|        |                                          |
|--------|------------------------------------------|
| 6387   | lidocaine                                |
| 6918   | metoprolol                               |
| 17767  | amlodipine                               |
| 5470   | hydralazine                              |
| CV701  | THIAZIDES/RELATED DIURETICS              |
| 20352  | carvedilol                               |
| CV704  | POTASSIUM SPARING/COMBINATIONS DIURETICS |
| 2599   | clonidine                                |
| 703    | amiodarone                               |
| 296    | adenosine                                |
| 18994  | benznidazole                             |
| 7421   | nifurtimox                               |
| 282446 | posaconazole                             |

**Supplementary Table S4.** Outcomes based on Current Procedural Terminology (CPT) codes, HL7 Terminology, and International Classification of Diseases, Tenth Revision, Clinical Modification (ICD-10-CM) diagnosis codes

| Code(s)                                                           | Description        |
|-------------------------------------------------------------------|--------------------|
| Ill-defined and unknown cause of mortality (R99);<br>or Deceased. | Mortality          |
| 1013659, 1013660, 1013699<br>1013729, 1014309, 99291              | Hospitalization    |
| I63                                                               | Stroke             |
| I26                                                               | Pulmonary embolism |



|                                                                                                                                                                                                                                                                                                                                       |                                           |
|---------------------------------------------------------------------------------------------------------------------------------------------------------------------------------------------------------------------------------------------------------------------------------------------------------------------------------------|-------------------------------------------|
| <ul style="list-style-type: none"><li>• Atrioventricular and left bundle-branch block (I44); or</li><li>• Other conduction disorders (I45); or</li><li>• Cardiac arrest (I46); or</li><li>• Paroxysmal tachycardia (I47); or</li><li>• Atrial fibrillation and flutter (I48); or</li><li>• Other cardiac arrhythmias (I49).</li></ul> | Arrhythmias                               |
| I25.3                                                                                                                                                                                                                                                                                                                                 | Left ventricular aneurysm                 |
| Z86.74                                                                                                                                                                                                                                                                                                                                | Personal history of sudden cardiac arrest |
